# Supplementary material
Source: MDPI journal article supplement (https://www.mdpi.com/1996-1073/13/15/3772)
Supplement: s1 [file s1]

# Supplementary Materials:

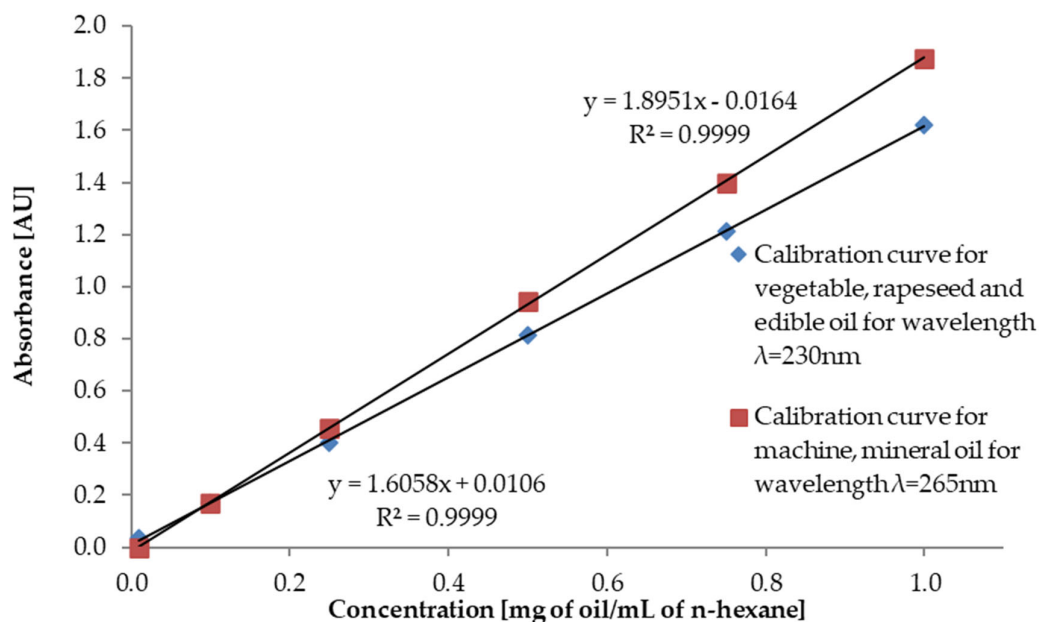

Figure S.1. UV-VIS calibration curves for mineral and vegetable oils,  $\lambda = 230$  and  $\lambda = 265$  nm for high concentrations.

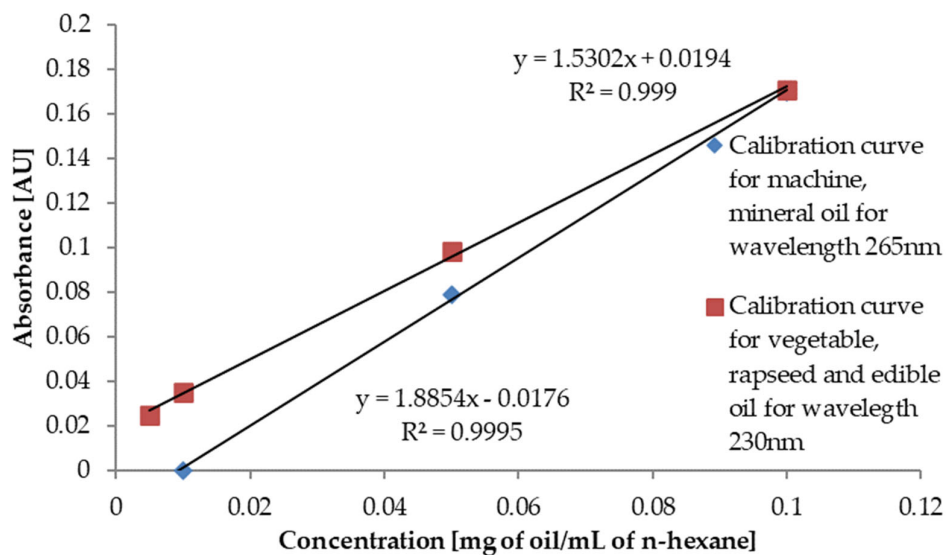

Figure S.2. UV-VIS calibration curves for mineral and vegetable oils,  $\lambda = 230$  and  $\lambda = 265$  nm for low concentrations.

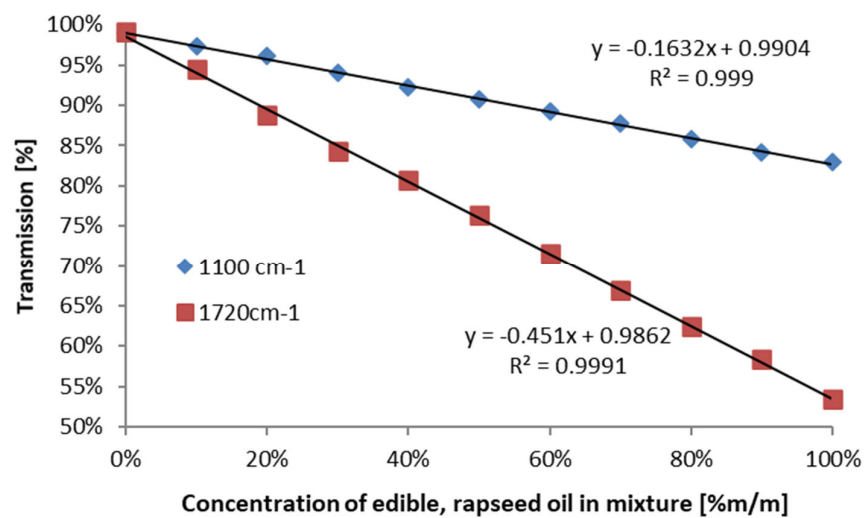

Figure S.3. FT-MIR calibration curves for wave numbers 1100 cm<sup>-1</sup> and 1747 cm<sup>-1</sup>.
